# Supplementary material for: Genetic influence on within-person longitudinal change in anthropometric traits in the UK Biobank
Source: PubMed Central journal article supplement (PMC11074304; doi:10.1038/s41467-024-47802-7), 2024-05-06
Supplement: 41467_2024_47802_MOESM3_ESM.pdf [file 41467_2024_47802_MOESM3_ESM.pdf]

## **Description of Additional Supplementary Files**

File Name: Supplementary Data 1

Description: This file contains the 70 independent population-level vQTL reaching genome-wide significance ( $P < 1 \times 10^{-8}$ ) across 8 traits; namely BMI, weight, fat percentage, hip circumference, waist circumference, and waist:hip ratio.
